# Supplementary material
Source: publisher site journal article supplement (https://www.dovepress.com/article/254864)
Supplement: Supplementary file 1 [file get_supplementary_file.php]

# Appendix I

## Fall risk screening instrument for frail older community dwelling people.

1. Have you experienced a fall during the past 12 months?
  - Yes → Possible high fall risk, investigate further with diagnose checklist
  - No → Go to question 2
  
2. Do you have a fear of falling?
  - Yes → Possible high fall risk, investigate further with diagnose checklist
  - No → If question 1 and 2 are answered with 'No', no further investigation is needed unless clinical expertise indicates otherwise.

## Diagnose checklist fall risk

| Cause high fall risk (Multiple causes possible)                                              |                                                                                     |                                                               |
|----------------------------------------------------------------------------------------------|-------------------------------------------------------------------------------------|---------------------------------------------------------------|
| <input type="checkbox"/> Limitations in mobility/ Activities Daily Living/ physical function | <input type="checkbox"/> Cardiovascular factors                                     | <input type="checkbox"/> Safety home                          |
| <input type="checkbox"/> Lack of exercise                                                    | <input type="checkbox"/> Syncope                                                    | <input type="checkbox"/> Wrong footwear                       |
| <input type="checkbox"/> Reduction muscle strength and balance                               | <input type="checkbox"/> Dizziness                                                  | <input type="checkbox"/> Incorrect use walking aid            |
| <input type="checkbox"/> Fear of falling                                                     | <input type="checkbox"/> Osteoporosis                                               | <input type="checkbox"/> Foot problems                        |
| <input type="checkbox"/> Polypharmacy, and/or use of sedative or sleep medication            | <input type="checkbox"/> Joint problems                                             | <input type="checkbox"/> Alcohol use                          |
| <input type="checkbox"/> Vision impairment                                                   | <input type="checkbox"/> Bone descaling                                             | <input type="checkbox"/> Nutrition                            |
| <input type="checkbox"/> Urine-incontinence, incontinence of defecation                      | <input type="checkbox"/> Fracture risk/ patient experienced past 3 years a fracture | <input type="checkbox"/> Other, namely.....<br>.....<br>..... |
| <input type="checkbox"/> Depressive symptoms                                                 | <input type="checkbox"/> Cognitive problems                                         |                                                               |

'Talking paper' is used to talk with the patient about the different causes of high fall risk. (Developed by M. Dooremalen, [www.doormiddelvan.nl](http://www.doormiddelvan.nl)).

Door Middel Van.

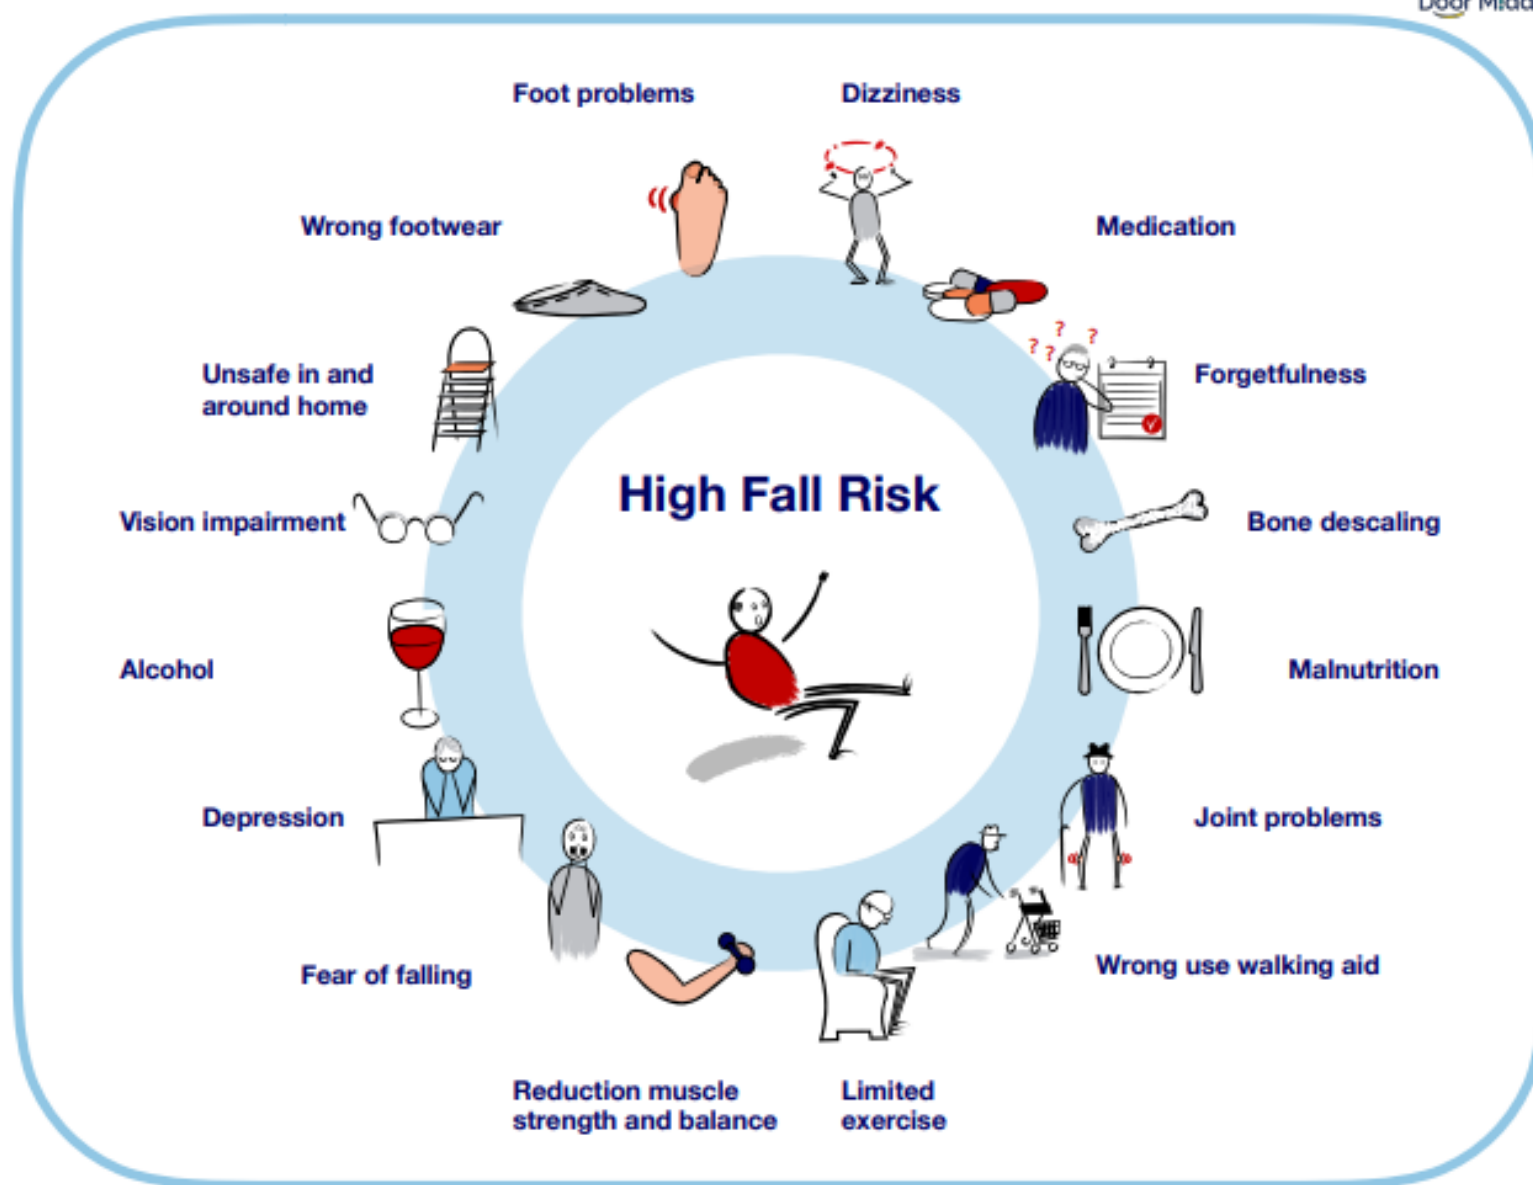

# Appendix II

**Flowchart 1: Set-up implementation targeted fall risk screening strategy by research team (Step 1 and Step 3)**

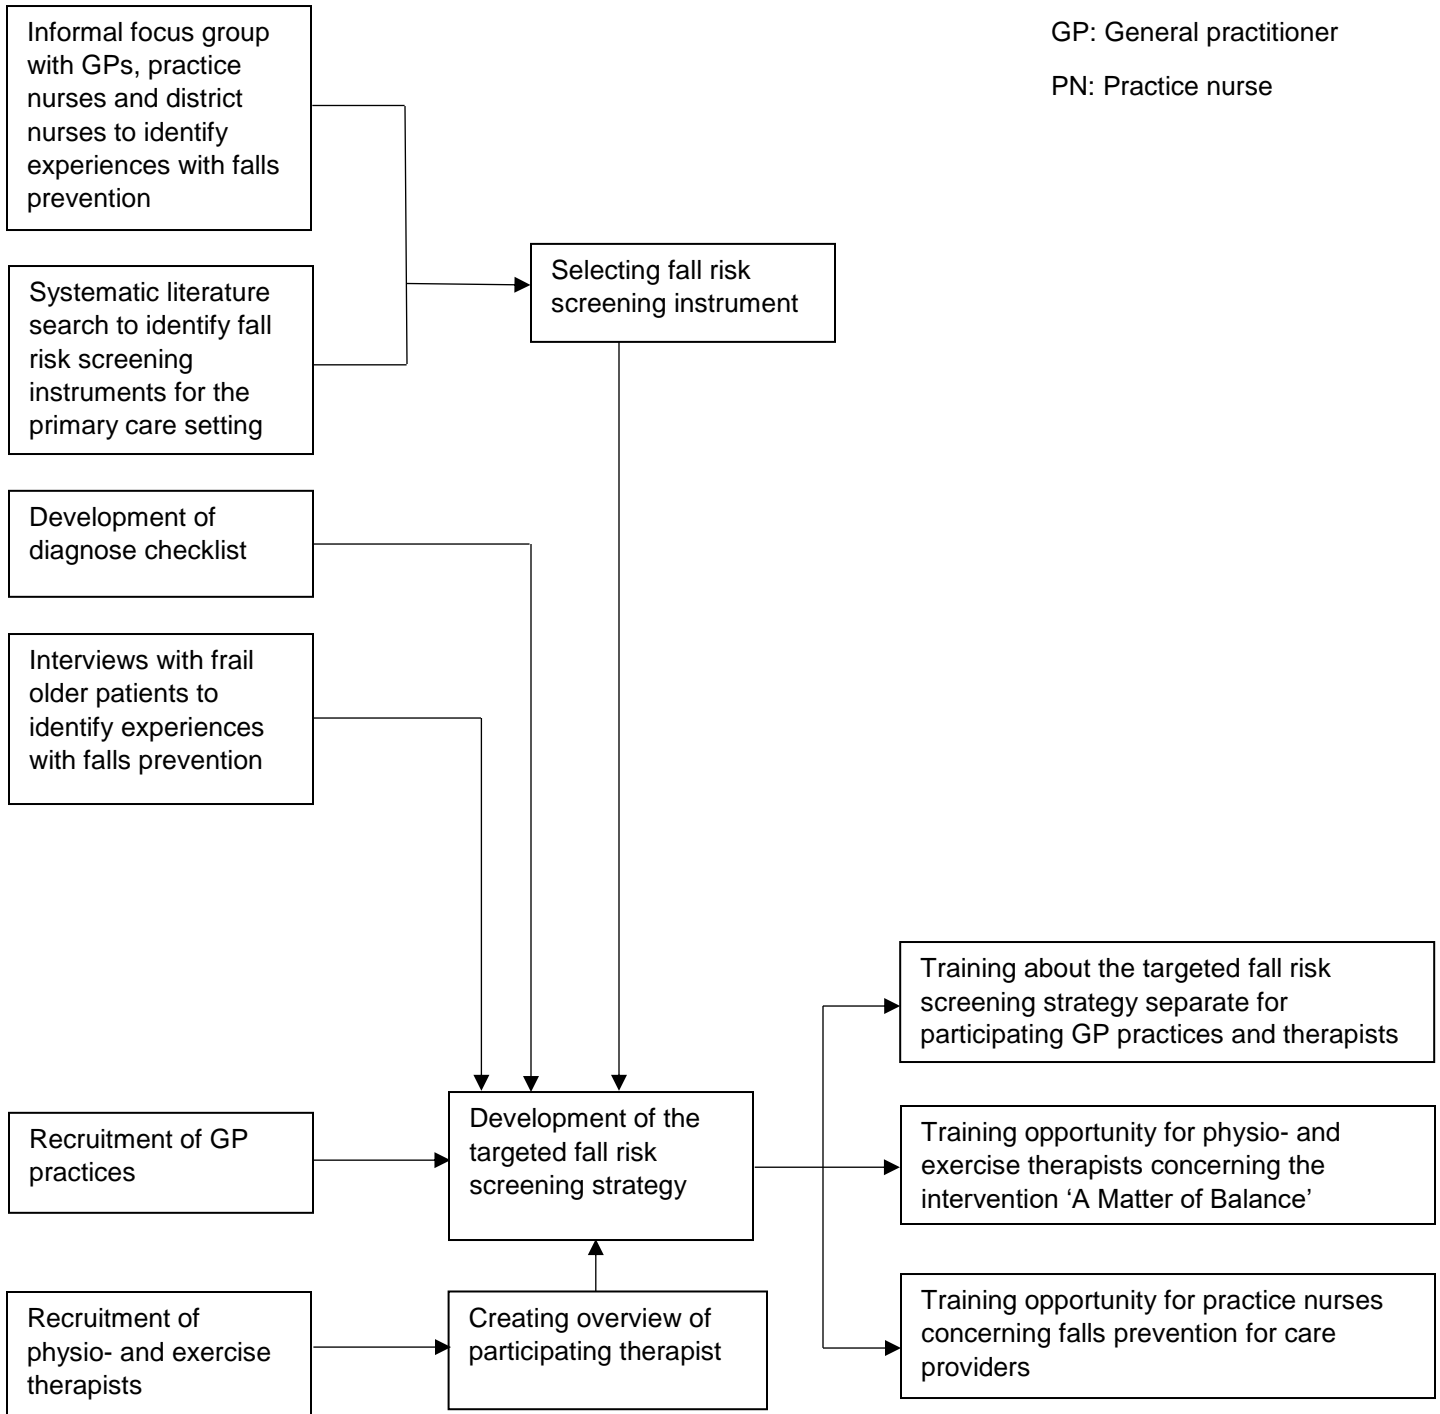

**Flowchart 2: Data collection among GP practices concerning evaluation of the targeted fall risk screening strategy (Step 2, Step 4 and Step 5)**

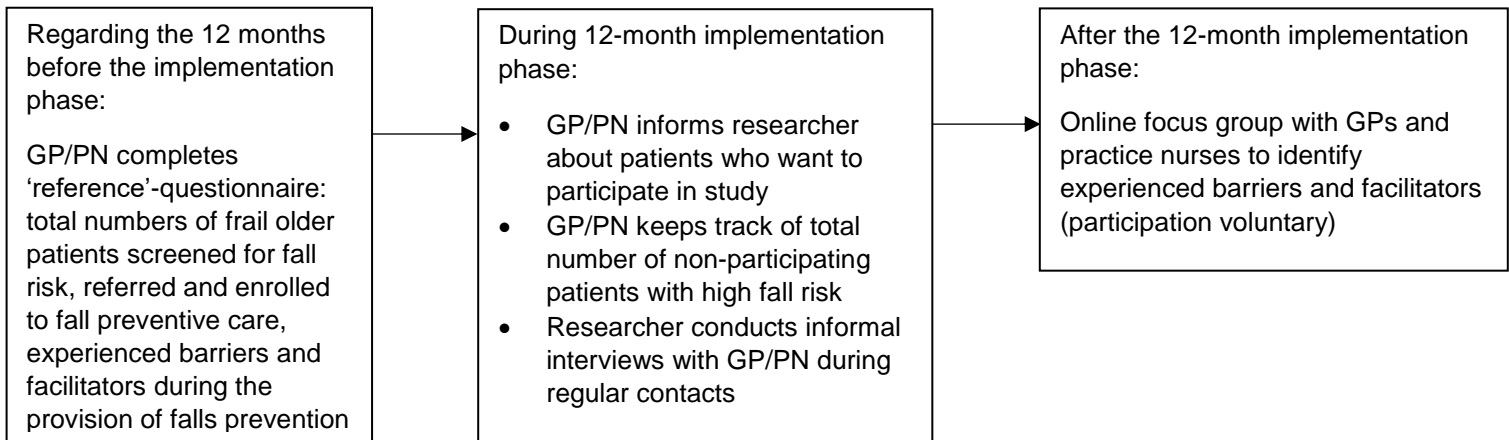

GP: General practitioner

PN: Practice nurse

**Flowchart 3: Data collection among physio- and exercise therapists concerning evaluation of the targeted fall risk screening strategy (Step 5)**

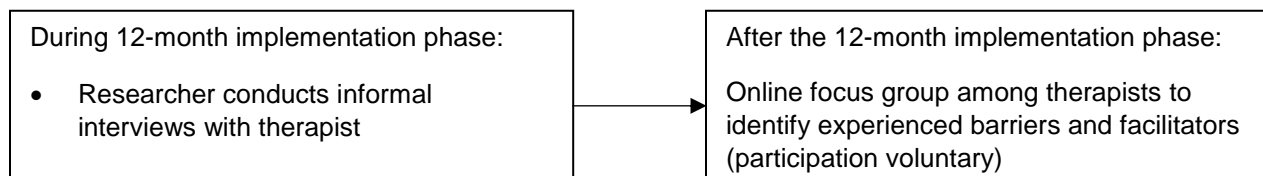

**Flowchart 4: Data collection among frail older patients with high fall risk concerning evaluation of the targeted fall risk screening strategy (Step 4 and Step 5)**

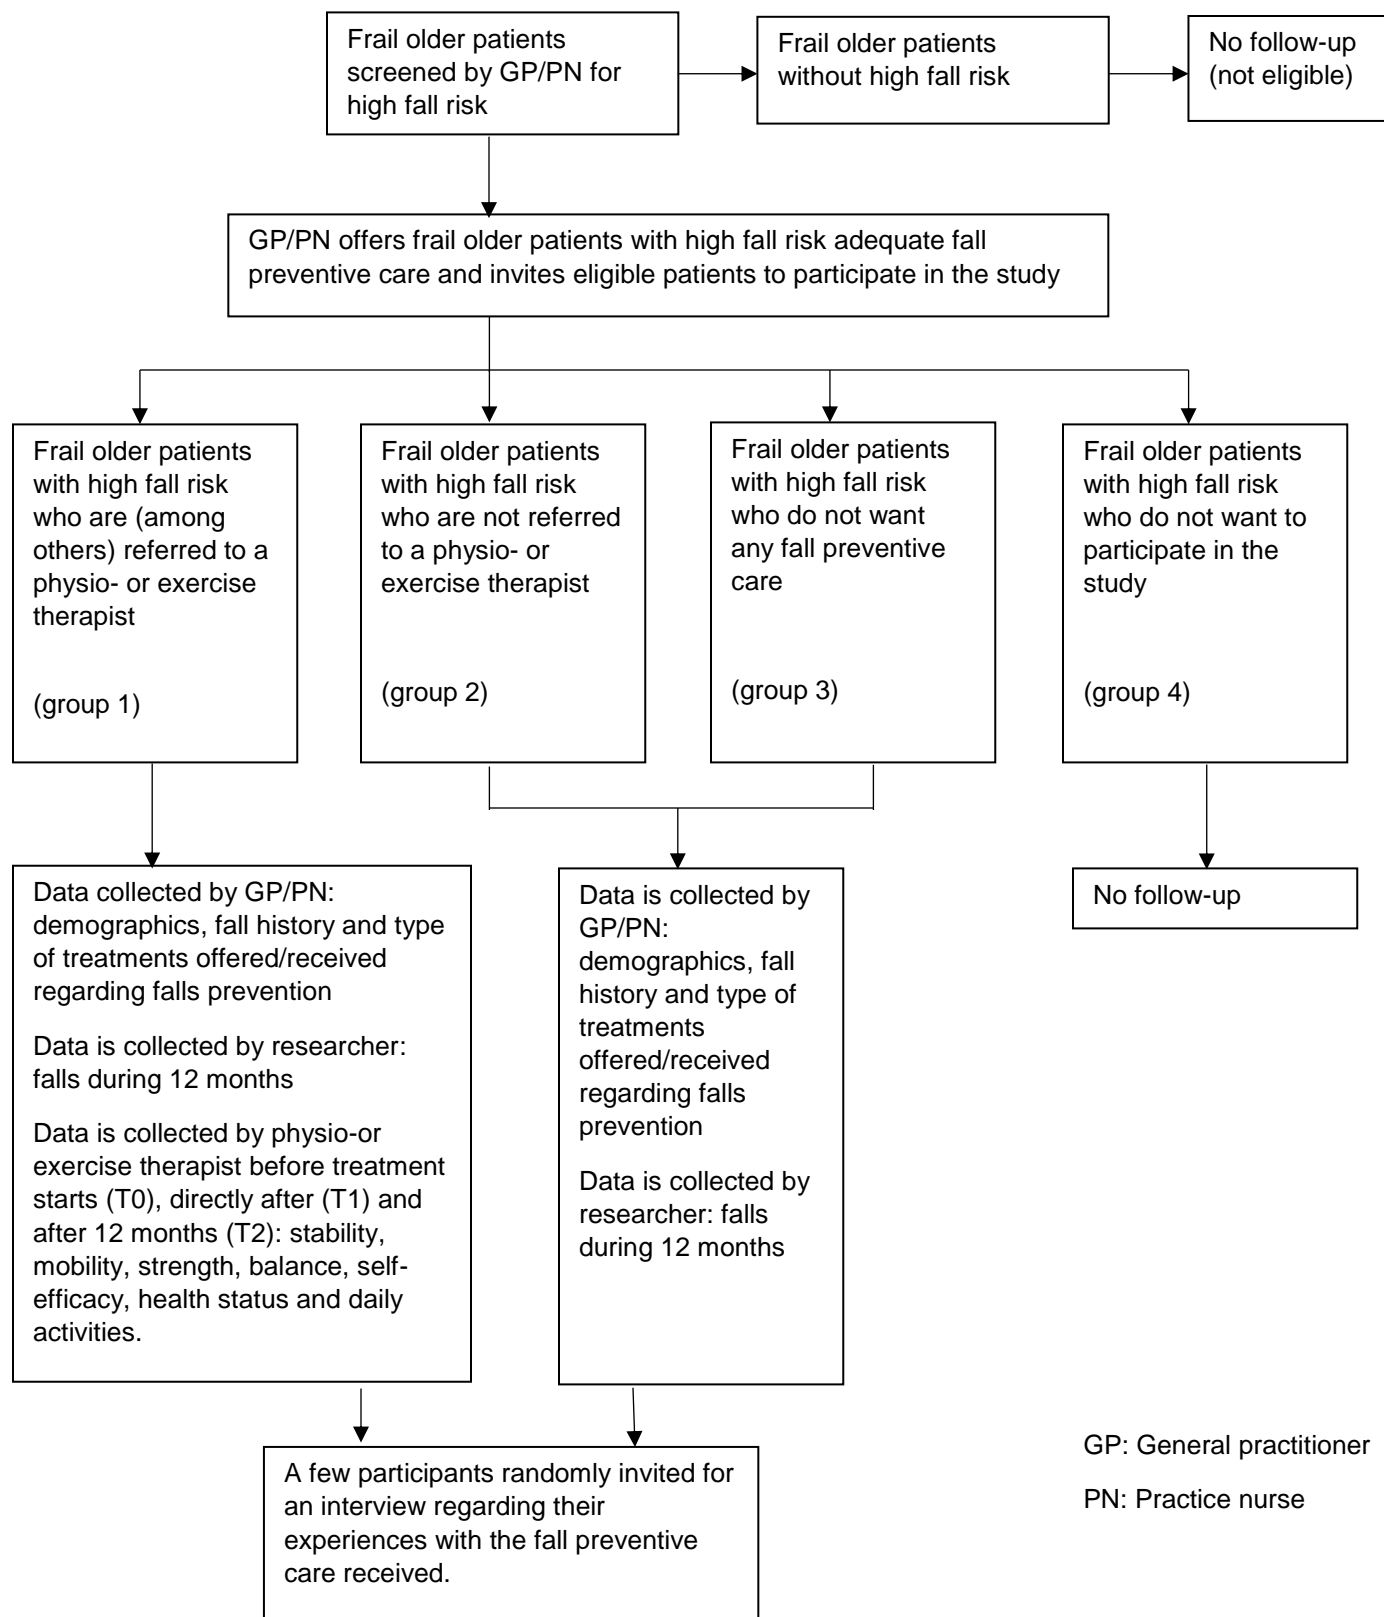

# Appendix III

## Sample Size Calculation

Dichotomous Endpoint, One-Sample Study

| Sample Size            |      |
|------------------------|------|
| Group 1                | 137  |
| Total                  | 137  |
| Study Parameters       |      |
| Incidence, population  | 20%  |
| Incidence, study group | 30%  |
| Alpha                  | 0.05 |
| Beta                   | 0.2  |
| Power                  | 0.8  |

### Power Calculations

$$N = \frac{p_0 q_0 \left\{ z_{1-\alpha/2} + z_{1-\beta} \sqrt{\frac{p_1 q_1}{p_0 q_0}} \right\}^2}{(p_1 - p_0)^2}$$
$$q_0 = 1 - p_0$$
$$q_1 = 1 - p_1$$
$$N = \frac{0.2 * 0.8 \left\{ 1.96 + 0.84 \sqrt{\frac{0.3 * 0.7}{0.2 * 0.8}} \right\}^2}{(0.3 - 0.2)^2}$$
$$N = 137$$

$p_0$  = proportion (incidence) of population  
 $p_1$  = proportion (incidence) of study group  
 $N$  = sample size for study group  
 $\alpha$  = probability of type I error (usually 0.05)  
 $\beta$  = probability of type II error (usually 0.2)  
 $z$  = critical Z value for a given  $\alpha$  or  $\beta$
